# Supplementary material for: Gaseous infrared spectra of the simplest geminal diol CH2(OH)2 and the isotopic analogues in the hydration of formaldehyde
Source: Royal Society of Chemistry journal article supplement (doi:10.1039/d1cp01354h), 2021-01-01
Supplement: d1cp01354h1.pdf [file d1cp01354h1.pdf]

## Supporting Information

# Gaseous infrared spectra of the simplest geminal diol $\text{CH}_2(\text{OH})_2$ and the isotopic analogues in the hydration of formaldehyde

*Hung-Yang Jain, Chih-Tsun Yang and Li-Kang Chu\**

Department of Chemistry, National Tsing Hua University, 101, Sec. 2, Kuang-Fu Rd., Hsinchu 30013, Taiwan.

Corresponding Author

\*To whom correspondence should be addressed. Phone: 886-3-5715131 ext. 33396. Fax: 886-3-5711082. E-mail: lkchu@mx.nthu.edu.tw

## Table of contents

### Supplementary Tables

Table S1. The partial pressures (Torr) of the samples for infrared spectroscopic measurements.

Table S2. Optimized molecular structures of *trans*-CH<sub>2</sub>(OH)<sub>2</sub> and *cis*-CH<sub>2</sub>(OH)<sub>2</sub> compared with CCSD(T) method.

Table S3. Optimized molecular structures of *trans*-CH<sub>2</sub>(OH)<sub>2</sub> compared with MP2 method.

Table S4. The equilibrium rotational constants of *trans*-CH<sub>2</sub>(OH)<sub>2</sub> predicted with B3LYP and other methods.

Table S5. The difference of predicted absolute energies of *trans*- and *cis*-CH<sub>2</sub>(OH)<sub>2</sub>.

Table S6. Optimized molecular structures of *trans*- and *cis*-CH<sub>2</sub>(OH)<sub>2</sub> isotopic analogues.

Table S7. Predicted absolute energies of *trans*- and *cis*-methanediol isotopic analogues and the energy difference  $\Delta E = \textit{trans} - \textit{cis}$ .

Table S8. Predicted vibrational wavenumber and the IR intensity of CH<sub>2</sub>(OH)<sub>2</sub>.

Table S9. Predicted vibrational wavenumber and the IR intensity of CD<sub>2</sub>(OH)<sub>2</sub>.

Table S10. Predicted vibrational wavenumber and the IR intensity of CH<sub>2</sub>(OD)<sub>2</sub>.

Table S11. Predicted vibrational wavenumber and the IR intensity of CD<sub>2</sub>(OD)<sub>2</sub>.

Table S12. Rotational parameters of *trans*-CH<sub>2</sub>(OH)<sub>2</sub> at  $v'' = 0$  and  $v' = 1$  for different vibrational modes.

Table S13. Rotational parameters of *trans*-CD<sub>2</sub>(OH)<sub>2</sub> at  $v'' = 0$  and  $v' = 1$  for different vibrational modes.

### Supplementary Figures

Figure S1. The pressures of the pure substances versus the integrated absorbances.

Figure S2. Dipole derivatives of relevant vibrations of *trans*-CH<sub>2</sub>(OH)<sub>2</sub> and *trans*-CD<sub>2</sub>(OH)<sub>2</sub>.

Figure S3. Gaseous IR absorption spectra of H<sub>2</sub>O, CH<sub>2</sub>O, and mixture of H<sub>2</sub>O and CH<sub>2</sub>O with more deposit.

**Table S1.** The partial pressures (Torr) of the samples for the infrared spectroscopic measurements.

|                            | $\text{CH}_2(\text{OH})_2$ | $\text{CD}_2(\text{OH})_2$ | $\text{CH}_2(\text{OD})_2$ | $\text{CD}_2(\text{OD})_2$ |
|----------------------------|----------------------------|----------------------------|----------------------------|----------------------------|
| P( $\text{H}_2\text{O}$ )  | 20.1                       | 26.3                       |                            |                            |
| P( $\text{D}_2\text{O}$ )  |                            |                            | 12.2                       | 19.3                       |
| P( $\text{CH}_2\text{O}$ ) | 9.8                        |                            | 6.9                        |                            |
| P( $\text{CD}_2\text{O}$ ) |                            | 9.6                        |                            | 8.6                        |
| P( $\text{N}_2$ )          | 11.0                       | 69.0                       | 8.9                        | 69.0                       |
| Total pressure             | 40.9                       | 104.9                      | 28.0                       | 96.9                       |

**Table S2.** Optimized molecular structures of *trans*-CH<sub>2</sub>(OH)<sub>2</sub> and *cis*-CH<sub>2</sub>(OH)<sub>2</sub> determined with B3LYP/aug-cc-pVTZ in vacuum. The predictions at the level of CCSD(T) using the basis set aug-cc-pVTZ [1] are included for comparison. (bond length (*d*): angstrom; bond angle ( $\angle$ ): degree; dihedral angle ( $\phi$ ): degree).

| Parameter                                            | <i>trans</i> -CH <sub>2</sub> (OH) <sub>2</sub>                                   |                |              | <i>cis</i> -CH <sub>2</sub> (OH) <sub>2</sub>                                       |                |              |
|------------------------------------------------------|-----------------------------------------------------------------------------------|----------------|--------------|-------------------------------------------------------------------------------------|----------------|--------------|
|                                                      | 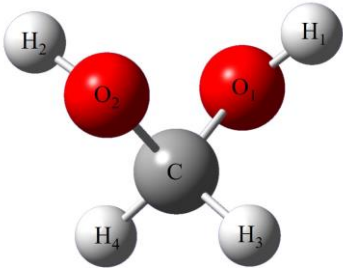 |                |              |  |                |              |
|                                                      | B3LYP                                                                             | CCSD(T)*       | $\Delta$ (%) | B3LYP                                                                               | CCSD(T)*       | $\Delta$ (%) |
| Point group                                          | C <sub>1</sub>                                                                    | C <sub>2</sub> |              | C <sub>1</sub>                                                                      | C <sub>s</sub> |              |
| <i>d</i> (C–O <sub>1</sub> )                         | 1.4082                                                                            | 1.4085         | –0.021       | 1.4092                                                                              | 1.4092         | 0.000        |
| <i>d</i> (C–O <sub>2</sub> )                         | 1.4081                                                                            |                | –0.028       | 1.4091                                                                              |                | –0.007       |
| <i>d</i> (O <sub>1</sub> –H <sub>1</sub> )           | 0.9635                                                                            | 0.9639         | –0.042       | 0.9620                                                                              | 0.9624         | –0.042       |
| <i>d</i> (O <sub>2</sub> –H <sub>2</sub> )           | 0.9636                                                                            |                | –0.031       | 0.9620                                                                              |                | –0.042       |
| <i>d</i> (C–H <sub>3</sub> )                         | 1.0914                                                                            | 1.0922         | –0.073       | 1.0954                                                                              | 1.0961         | –0.064       |
| <i>d</i> (C–H <sub>4</sub> )                         | 1.0914                                                                            | 1.0922         | –0.073       | 1.0866                                                                              | 1.0876         | –0.092       |
| $\angle$ O <sub>1</sub> CO <sub>2</sub>              | 112.9942                                                                          | 112.61         | 0.340        | 113.9044                                                                            | 113.61         | 0.258        |
| $\angle$ H <sub>1</sub> O <sub>1</sub> C             | 108.5327                                                                          | 107.42         | 1.025        | 109.9392                                                                            | 108.87         | 0.973        |
| $\angle$ H <sub>2</sub> O <sub>2</sub> C             | 108.5351                                                                          |                | 1.027        | 109.9427                                                                            |                | 0.976        |
| $\angle$ H <sub>3</sub> CO <sub>2</sub>              | 105.1985                                                                          | 105.29         | –0.087       | 110.4953                                                                            | 110.47         | 0.023        |
| $\angle$ H <sub>3</sub> CO <sub>1</sub>              | 111.7888                                                                          |                | 5.813        | 110.4816                                                                            |                | 0.010        |
| $\angle$ H <sub>4</sub> CO <sub>1</sub>              | 105.2043                                                                          | 105.29         | –0.081       | 105.8779                                                                            | 106.00         | –0.115       |
| $\angle$ H <sub>4</sub> CO <sub>2</sub>              | 111.7861                                                                          |                | 5.811        | 105.8708                                                                            |                | –0.122       |
| $\phi$ H <sub>1</sub> O <sub>1</sub> CO <sub>2</sub> | 62.7796                                                                           | 61.75          | 1.640        | 79.2727                                                                             | 78.63          | 0.811        |
| $\phi$ H <sub>2</sub> O <sub>2</sub> CO <sub>1</sub> | 62.7907                                                                           | 61.75          | 1.657        | –79.0590                                                                            | –78.63         | 0.543        |
| $\phi$ H <sub>3</sub> CO <sub>2</sub> O <sub>1</sub> | 122.2166                                                                          | 122.08         | 0.112        | 125.0489                                                                            | 124.79         | 0.207        |
| $\phi$ H <sub>4</sub> CO <sub>1</sub> O <sub>2</sub> | 122.2171                                                                          | 122.08         | 0.112        | 115.9168                                                                            | 116.0          | –0.072       |

\*: Ref. 1;  $\Delta = 100 \times [\text{B3LYP} - \text{CCSD(T)}] / \text{B3LYP}$ .

**Table S3.** Optimized molecular structures of *trans*-CH<sub>2</sub>(OH)<sub>2</sub> determined with B3LYP/aug-cc-pVTZ in vacuum. The predictions at the level of MP2 using the basis set aug-cc-pVTZ [2] are included for comparison. (bond length (*d*): angstrom; bond angle (∠): degree).

| Parameter                                  | <i>trans</i> -CH <sub>2</sub> (OH) <sub>2</sub> (C <sub>1</sub> )                  |          |           |
|--------------------------------------------|------------------------------------------------------------------------------------|----------|-----------|
|                                            | 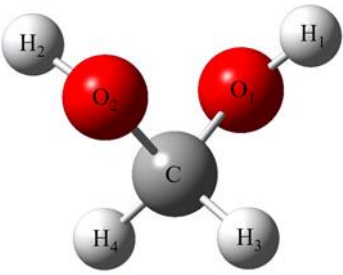 |          |           |
|                                            | B3LYP                                                                              | MP2*     | diff. (%) |
| <i>d</i> (C–O <sub>1</sub> )               | 1.4082                                                                             | 1.4066   | 0.114     |
| <i>d</i> (C–O <sub>2</sub> )               | 1.4081                                                                             | 1.4065   | 0.114     |
| <i>d</i> (C–H <sub>3</sub> )               | 1.0914                                                                             | 1.0890   | 0.220     |
| <i>d</i> (C–H <sub>4</sub> )               | 1.0914                                                                             | 1.0890   | 0.220     |
| <i>d</i> (O <sub>1</sub> –H <sub>1</sub> ) | 0.9635                                                                             | 0.9639   | –0.042    |
| <i>d</i> (O <sub>2</sub> –H <sub>2</sub> ) | 0.9636                                                                             | 0.9639   | –0.031    |
| ∠H <sub>1</sub> O <sub>1</sub> C           | 108.5327                                                                           | 107.3950 | 1.048     |
| ∠H <sub>2</sub> O <sub>2</sub> C           | 108.5351                                                                           | 107.3927 | 1.053     |
| ∠O <sub>1</sub> CO <sub>2</sub>            | 112.9942                                                                           | 112.7767 | 0.192     |
| ∠H <sub>3</sub> CH <sub>4</sub>            | 109.9782                                                                           | 110.2472 | –0.245    |

\*: Ref.2;  $\Delta = 100 \times [\text{B3LYP} - \text{MP2}] / \text{B3LYP}$ .

**Table S4.** The equilibrium rotational constants of *trans*-CH<sub>2</sub>(OH)<sub>2</sub> predicted with B3LYP and other methods [1,2] using the same basis set aug-cc-pVTZ.

| Method               | Rotational constant (cm <sup>-1</sup> ) |        |        |
|----------------------|-----------------------------------------|--------|--------|
|                      | A                                       | B      | C      |
| B3LYP                | 1.4001                                  | 0.3375 | 0.2996 |
| B3LYP <sup>a</sup>   | 1.4000                                  | 0.3375 | 0.2995 |
| MP2 <sup>a</sup>     | 1.3977                                  | 0.3401 | 0.3014 |
| QCISD <sup>a</sup>   | 1.3973                                  | 0.3419 | 0.3028 |
| CCSD(T) <sup>a</sup> | 1.3899                                  | 0.3397 | 0.3008 |
| MP2 <sup>b</sup>     | 1.3981                                  | 0.3399 | 0.3013 |

<sup>a</sup>: Ref. 1; <sup>b</sup>: Ref. 2. <sup>b</sup>These values were not specified to correspond to the rotational constants at equilibrium or vibrationally-ground state.

**Table S5.** Comparison of the difference of predicted absolute energies ( $\Delta E$ ) and Gibb's free energies ( $\Delta G$ ) of *trans*-CH<sub>2</sub>(OH)<sub>2</sub> and *cis*-CH<sub>2</sub>(OH)<sub>2</sub>:  $\Delta E$  or  $\Delta G = \textit{trans}\text{-CH}_2(\text{OH})_2 - \textit{cis}\text{-CH}_2(\text{OH})_2$ . The basis set aug-cc-pVTZ was employed in this work and the previous report [1].

| Method | $\Delta E$ in kcal mol <sup>-1</sup> | $\Delta G$ (298 K) in kcal mol <sup>-1</sup> |
|--------|--------------------------------------|----------------------------------------------|
| B3LYP  | -2.20                                | -2.01                                        |
| B3LYP* | -2.26                                | -1.65                                        |
| MP2*   | -2.38                                | -1.72                                        |
| QCISD* | -2.35                                | -1.68                                        |

\*: Ref. 1.

**Table S6.** Optimized molecular structures of *trans*- and *cis*-CH<sub>2</sub>(OH)<sub>2</sub>, CD<sub>2</sub>(OH)<sub>2</sub>, CD<sub>2</sub>(OH)<sub>2</sub>, and CD<sub>2</sub>(OD)<sub>2</sub> determined with B3LYP/aug-cc-pVTZ. (bond length (*d*): angstrom; bond angle ( $\angle$ ): degree; dihedral angle ( $\phi$ ): degree).

| parameter                                            | <i>trans</i> -methanediol         |                                   |                                   |                                   | <i>cis</i> -methanediol           |                                   |                                   |                                   |
|------------------------------------------------------|-----------------------------------|-----------------------------------|-----------------------------------|-----------------------------------|-----------------------------------|-----------------------------------|-----------------------------------|-----------------------------------|
|                                                      | CH <sub>2</sub> (OH) <sub>2</sub> | CD <sub>2</sub> (OH) <sub>2</sub> | CH <sub>2</sub> (OD) <sub>2</sub> | CD <sub>2</sub> (OD) <sub>2</sub> | CH <sub>2</sub> (OH) <sub>2</sub> | CD <sub>2</sub> (OH) <sub>2</sub> | CH <sub>2</sub> (OD) <sub>2</sub> | CD <sub>2</sub> (OD) <sub>2</sub> |
| <i>d</i> (C–O <sub>1</sub> )                         | 1.4082                            | 1.4082                            | 1.4082                            | 1.4082                            | 1.4092                            | 1.4092                            | 1.4092                            | 1.4092                            |
| <i>d</i> (C–O <sub>2</sub> )                         | 1.4081                            | 1.4081                            | 1.4081                            | 1.4081                            | 1.4091                            | 1.4091                            | 1.4091                            | 1.4091                            |
| <i>d</i> (O <sub>1</sub> –H <sub>1</sub> )           | 0.9635                            | 0.9635                            | 0.9635                            | 0.9635                            | 0.9620                            | 0.9620                            | 0.9620                            | 0.9620                            |
| <i>d</i> (O <sub>2</sub> –H <sub>2</sub> )           | 0.9636                            | 0.9636                            | 0.9636                            | 0.9636                            | 0.9620                            | 0.9620                            | 0.9620                            | 0.9620                            |
| <i>d</i> (C–H <sub>3</sub> )                         | 1.0914                            | 1.0914                            | 1.0914                            | 1.0914                            | 1.0954                            | 1.0954                            | 1.0954                            | 1.0954                            |
| <i>d</i> (C–H <sub>4</sub> )                         | 1.0914                            | 1.0914                            | 1.0914                            | 1.0914                            | 1.0866                            | 1.0866                            | 1.0866                            | 1.0866                            |
| $\angle$ O <sub>1</sub> CO <sub>2</sub>              | 112.9942                          | 112.9942                          | 112.9942                          | 112.9942                          | 113.9044                          | 113.9044                          | 113.9044                          | 113.9044                          |
| $\angle$ H <sub>1</sub> O <sub>1</sub> C             | 108.5327                          | 108.5327                          | 108.5327                          | 108.5327                          | 109.9392                          | 109.9392                          | 109.9392                          | 109.9392                          |
| $\angle$ H <sub>2</sub> O <sub>2</sub> C             | 108.5351                          | 108.5351                          | 108.5351                          | 108.5351                          | 109.9427                          | 109.9427                          | 109.9427                          | 109.9427                          |
| $\angle$ H <sub>3</sub> CO <sub>2</sub>              | 105.1985                          | 105.1985                          | 105.1985                          | 105.1985                          | 110.4953                          | 110.4953                          | 110.4953                          | 110.4953                          |
| $\angle$ H <sub>3</sub> CO <sub>1</sub>              | 111.7888                          | 111.7888                          | 111.7888                          | 111.7888                          | 110.4816                          | 110.4816                          | 110.4816                          | 110.4816                          |
| $\angle$ H <sub>4</sub> CO <sub>1</sub>              | 105.2043                          | 105.2043                          | 105.2043                          | 105.2043                          | 105.8779                          | 105.8779                          | 105.8779                          | 105.8779                          |
| $\angle$ H <sub>4</sub> CO <sub>2</sub>              | 111.7861                          | 111.7861                          | 111.7861                          | 111.7861                          | 105.8708                          | 105.8708                          | 105.8708                          | 105.8708                          |
| $\phi$ H <sub>1</sub> O <sub>1</sub> CO <sub>2</sub> | 62.7796                           | 62.7796                           | 62.7796                           | 62.7796                           | 79.2727                           | 79.2727                           | 79.2727                           | 79.2727                           |
| $\phi$ H <sub>2</sub> O <sub>2</sub> CO <sub>1</sub> | 62.7907                           | 62.7907                           | 62.7907                           | 62.7907                           | –79.0590                          | –79.0590                          | –79.0590                          | –79.0590                          |
| $\phi$ H <sub>3</sub> CO <sub>2</sub> O <sub>1</sub> | 122.2166                          | 122.2166                          | 122.2166                          | 122.2166                          | 125.0489                          | 125.0489                          | 125.0489                          | 125.0489                          |
| $\phi$ H <sub>4</sub> CO <sub>1</sub> O <sub>2</sub> | 122.2171                          | 122.2171                          | 122.2171                          | 122.2171                          | 115.9168                          | 115.9168                          | 115.9168                          | 115.9168                          |



**Table S7.** The absolute energies and Gibb’s free energy difference at 298 K (hartrees) of *trans*- and *cis*-CH<sub>2</sub>(OH)<sub>2</sub>, CD<sub>2</sub>(OH)<sub>2</sub>, CH<sub>2</sub>(OD)<sub>2</sub>, and CD<sub>2</sub>(OD)<sub>2</sub> and  $\Delta E$  or  $\Delta G = trans - cis$  predicted using B3LYP/aug-cc-pVTZ including zero-point energy. The values of  $\Delta E$  and  $\Delta G$  in kcal mol<sup>-1</sup> are presented in the parentheses.

| Conformer          | Molecules                         |                                   |                                   |                                   |
|--------------------|-----------------------------------|-----------------------------------|-----------------------------------|-----------------------------------|
|                    | CH <sub>2</sub> (OH) <sub>2</sub> | CD <sub>2</sub> (OH) <sub>2</sub> | CH <sub>2</sub> (OD) <sub>2</sub> | CD <sub>2</sub> (OD) <sub>2</sub> |
| <i>trans</i>       | -190.9808                         | -190.9877                         | -190.9875                         | -190.9943                         |
| <i>cis</i>         | -190.9773                         | -190.9841                         | -190.9838                         | -190.9907                         |
| $\Delta E$         | -0.0035<br>(-2.20)                | -0.0036<br>(-2.26)                | -0.0037<br>(-2.32)                | -0.0036<br>(-2.26)                |
| <i>trans</i>       | -191.0058                         | -191.0129                         | -191.0129                         | -191.0200                         |
| <i>cis</i>         | -191.0026                         | -191.0097                         | -191.0096                         | -191.0168                         |
| $\Delta G$ (298 K) | -0.0032<br>(-2.01)                | -0.0032<br>(-2.01)                | -0.0033<br>(-2.07)                | -0.0032<br>(-2.01)                |

**Table S8.** Harmonic wavenumber ( $\text{cm}^{-1}$ ) and the IR intensity ( $\text{km mol}^{-1}$ ) of  $\text{CH}_2(\text{OH})_2$  predicted using B3LYP/aug-cc-pVTZ. Anharmonic wavenumber and corresponding infrared intensity are provided in the parentheses.

| Vibrational mode |                              | <i>trans</i> - $\text{CH}_2(\text{OH})_2$ |           | Vibrational mode |                              | <i>cis</i> - $\text{CH}_2(\text{OH})_2$ |           |
|------------------|------------------------------|-------------------------------------------|-----------|------------------|------------------------------|-----------------------------------------|-----------|
|                  |                              | B3LYP/aug-cc-pVTZ                         |           |                  |                              | B3LYP/aug-cc-pVTZ                       |           |
|                  |                              | Wavenumber                                | Intensity |                  |                              | Wavenumber                              | Intensity |
| $\nu_1$          | OH stret.                    | 3795 (3617)                               | 24 (27)   | $\nu_1$          | OH stret.                    | 3812 (3623)                             | 19 (18)   |
| $\nu_2$          | OH stret.                    | 3794 (3612)                               | 44 (28)   | $\nu_2$          | OH stret.                    | 3810 (3622)                             | 39 (31)   |
| $\nu_3$          | $\text{CH}_2$ stret.         | 3077 (2937)                               | 38 (43)   | $\nu_3$          | $\text{CH}_2$ stret.         | 3121 (2980)                             | 21 (26)   |
| $\nu_4$          | $\text{CH}_2$ stret.         | 3031 (2897)                               | 55 (36)   | $\nu_4$          | $\text{CH}_2$ stret.         | 2993 (2864)                             | 71 (53)   |
| $\nu_5$          | $\text{CH}_2$ sciss.         | 1526 (1486)                               | 0 (0)     | $\nu_5$          | $\text{CH}_2$ sciss.         | 1514 (1478)                             | 0 (0)     |
| $\nu_6$          | $\text{CH}_2$ wag            | 1442 (1413)                               | 49 (55)   | $\nu_6$          | $\text{CH}_2$ wag            | 1436 (1404)                             | 23 (23)   |
| $\nu_7$          | $\text{CH}_2$ twist          | 1388 (1354)                               | 3 (3)     | $\nu_7$          | $\text{CH}_2$ rock           | 1404 (1363)                             | 20 (14)   |
| $\nu_8$          | COH bend                     | 1368 (1311)                               | 34 (15)   | $\nu_8$          | $\text{CH}_2$ twist          | 1369 (1320)                             | 3 (1)     |
| $\nu_9$          | COH bend + $\text{CH}_2$ wag | 1202 (1176)                               | 2 (2)     | $\nu_9$          | COH bend + $\text{CH}_2$ wag | 1162 (1149)                             | 75 (45)   |
| $\nu_{10}$       | OCO asym. stret.             | 1045 (1012)                               | 285 (289) | $\nu_{10}$       | OCO sym. stret.              | 1053 (1029)                             | 33 (23)   |
| $\nu_{11}$       | OCO sym. stret.              | 1030 (1003)                               | 92 (92)   | $\nu_{11}$       | OCO asym. stret.             | 1035 (1004)                             | 307 (304) |
| $\nu_{12}$       | $\text{CH}_2$ rock           | 1006 (997)                                | 5 (3)     | $\nu_{12}$       | $\text{CH}_2$ rock           | 993 (980)                               | 50 (56)   |
| $\nu_{13}$       | OCO bend                     | 554 (532)                                 | 60 (45)   | $\nu_{13}$       | OCO bend                     | 534 (526)                               | 24 (8)    |
| $\nu_{14}$       | COH torsion                  | 376 (362)                                 | 61 (80)   | $\nu_{14}$       | COH torsion                  | 381 (307)                               | 117 (99)  |
| $\nu_{15}$       | COH torsion                  | 367 (316)                                 | 160 (135) | $\nu_{15}$       | COH torsion                  | 178 (63)                                | 71 (41)   |

**Table S9.** Harmonic wavenumber ( $\text{cm}^{-1}$ ) and the IR intensity ( $\text{km mol}^{-1}$ ) of  $\text{CD}_2(\text{OH})_2$  using predicted B3LYP/aug-cc-pVTZ. Anharmonic wavenumber and corresponding infrared intensity are provided in the parentheses.

| Vibrational mode |                                | <i>trans</i> - $\text{CD}_2(\text{OH})_2$ |           | Vibrational mode |                                | <i>cis</i> - $\text{CD}_2(\text{OH})_2$ |           |
|------------------|--------------------------------|-------------------------------------------|-----------|------------------|--------------------------------|-----------------------------------------|-----------|
|                  |                                | B3LYP/aug-cc-pVTZ                         |           |                  |                                | B3LYP/aug-cc-pVTZ                       |           |
|                  |                                | Wavenumber                                | Intensity |                  |                                | Wavenumber                              | Intensity |
| $\nu_1$          | OH stret.                      | 3795 (3618)                               | 24 (27)   | $\nu_1$          | OH stret.                      | 3812 (3624)                             | 18 (17)   |
| $\nu_2$          | OH stret.                      | 3794 (3612)                               | 45 (29)   | $\nu_2$          | OH stret.                      | 3810 (3622)                             | 40 (31)   |
| $\nu_3$          | $\text{CD}_2$ stret.           | 2295 (2214)                               | 28 (29)   | $\nu_3$          | $\text{CD}_2$ stret.           | 2317 (2219)                             | 18 (16)   |
| $\nu_4$          | $\text{CD}_2$ stret.           | 2199 (2082)                               | 40 (23)   | $\nu_4$          | $\text{CD}_2$ stret.           | 2182 (2071)                             | 49 (25)   |
| $\nu_5$          | COH bend                       | 1329 (1283)                               | 98 (77)   | $\nu_5$          | COH bend + $\text{CD}_2$ rock  | 1355 (1315)                             | 24 (21)   |
| $\nu_6$          | COH bend + $\text{CD}_2$ scis. | 1304 (1270)                               | 8 (6)     | $\nu_6$          | COH bend + $\text{CD}_2$ twist | 1243 (1201)                             | 80 (58)   |
| $\nu_7$          | $\text{CD}_2$ sciss.           | 1134 (1110)                               | 25 (23)   | $\nu_7$          | $\text{CD}_2$ sciss.           | 1137 (1118)                             | 19 (14)   |
| $\nu_8$          | $\text{CD}_2$ wag              | 1118 (1088)                               | 144 (128) | $\nu_8$          | $\text{CD}_2$ wag              | 1112 (1084)                             | 157 (135) |
| $\nu_9$          | OCO sym. stret.                | 994 (973)                                 | 54 (59)   | $\nu_9$          | OCO sym. stret.                | 992 (973)                               | 40 (41)   |
| $\nu_{10}$       | OCO asym. stret.               | 982 (963)                                 | 113 (127) | $\nu_{10}$       | OCO asym. stret.               | 984 (962)                               | 148 (159) |
| $\nu_{11}$       | $\text{CD}_2$ twist            | 915 (895)                                 | 5 (2)     | $\nu_{11}$       | $\text{CD}_2$ twist            | 925 (903)                               | 24 (21)   |
| $\nu_{12}$       | $\text{CD}_2$ rock             | 846 (834)                                 | 22 (20)   | $\nu_{12}$       | $\text{CD}_2$ rock             | 842 (833)                               | 14 (15)   |
| $\nu_{13}$       | OCO bend                       | 548 (526)                                 | 62 (47)   | $\nu_{13}$       | OCO bend                       | 526 (519)                               | 25 (8)    |
| $\nu_{14}$       | COH torsion                    | 374 (362)                                 | 59 (77)   | $\nu_{14}$       | COH torsion                    | 376 (303)                               | 123 (94)  |
| $\nu_{15}$       | COH torsion                    | 362 (312)                                 | 154 (132) | $\nu_{15}$       | COH torsion                    | 178 (65)                                | 70 (42)   |

**Table S10.** Harmonic wavenumber ( $\text{cm}^{-1}$ ) and the IR intensity ( $\text{km mol}^{-1}$ ) of  $\text{CH}_2(\text{OD})_2$  predicted using B3LYP/aug-cc-pVTZ. Anharmonic wavenumber and corresponding infrared intensity are provided in the parentheses.

| Vibrational mode |                                  | <i>trans</i> - $\text{CH}_2(\text{OD})_2$ |           | Vibrational mode |                                  | <i>cis</i> - $\text{CH}_2(\text{OD})_2$ |           |
|------------------|----------------------------------|-------------------------------------------|-----------|------------------|----------------------------------|-----------------------------------------|-----------|
|                  |                                  | B3LYP/aug-cc-pVTZ                         |           |                  |                                  | B3LYP/aug-cc-pVTZ                       |           |
|                  |                                  | Wavenumber                                | Intensity |                  |                                  | Wavenumber                              | Intensity |
| $\nu_1$          | CH <sub>2</sub> stret.           | 3078 (2936)                               | 34 (40)   | $\nu_1$          | CH <sub>2</sub> stret.           | 3122 (2983)                             | 17 (22)   |
| $\nu_2$          | CH <sub>2</sub> stret.           | 3032 (2899)                               | 52 (35)   | $\nu_2$          | CH <sub>2</sub> stret.           | 2993 (2867)                             | 71 (52)   |
| $\nu_3$          | OD stret.                        | 2762 (2664)                               | 19 (19)   | $\nu_3$          | OD stret.                        | 2775 (2675)                             | 14 (13)   |
| $\nu_4$          | OD stret.                        | 2761 (2669)                               | 31 (19)   | $\nu_4$          | OD stret.                        | 2773 (2674)                             | 28 (21)   |
| $\nu_5$          | CH <sub>2</sub> sciss.           | 1526 (1488)                               | 0 (0)     | $\nu_5$          | CH <sub>2</sub> sciss.           | 1514 (1477)                             | 0 (0)     |
| $\nu_6$          | CH <sub>2</sub> wag              | 1430 (1398)                               | 20 (17)   | $\nu_6$          | CH <sub>2</sub> wag              | 1432 (1403)                             | 16 (14)   |
| $\nu_7$          | CH <sub>2</sub> twist            | 1326 (1291)                               | 0 (0)     | $\nu_7$          | CH <sub>2</sub> twist            | 1334 (1298)                             | 0 (0)     |
| $\nu_8$          | COD bend + CH <sub>2</sub> rock  | 1235 (1208)                               | 15 (14)   | $\nu_8$          | COD bend + CH <sub>2</sub> rock  | 1244 (1213)                             | 7 (7)     |
| $\nu_9$          | OCO sym. stret.                  | 1069 (1040)                               | 43 (38)   | $\nu_9$          | OCO sym. stret.                  | 1043 (1026)                             | 58 (47)   |
| $\nu_{10}$       | OCO asym. stret.                 | 1042 (1008)                               | 270 (262) | $\nu_{10}$       | OCO asym. stret.                 | 1034 (1006)                             | 293 (258) |
| $\nu_{11}$       | COD bend + CH <sub>2</sub> twist | 919 (900)                                 | 32 (33)   | $\nu_{11}$       | COD bend + CH <sub>2</sub> twist | 878 (861)                               | 48 (52)   |
| $\nu_{12}$       | COD bend + CH <sub>2</sub> rock  | 833 (826)                                 | 23 (22)   | $\nu_{12}$       | COD bend + CH <sub>2</sub> rock  | 849 (836)                               | 18 (17)   |
| $\nu_{13}$       | OCO bend                         | 519 (505)                                 | 38 (32)   | $\nu_{13}$       | OCO bend                         | 523 (509)                               | 24 (16)   |
| $\nu_{14}$       | COD torsion                      | 283 (240)                                 | 95 (70)   | $\nu_{14}$       | COD torsion                      | 284 (241)                               | 54 (49)   |
| $\nu_{15}$       | COD torsion                      | 273 (269)                                 | 37 (57)   | $\nu_{15}$       | COD torsion                      | 131 (44)                                | 39 (22)   |

**Table S11.** Harmonic wavenumber ( $\text{cm}^{-1}$ ) and the IR intensity ( $\text{km mol}^{-1}$ ) of  $\text{CD}_2(\text{OD})_2$  predicted using B3LYP/aug-cc-pVTZ. Anharmonic wavenumber and corresponding infrared intensity are provided in the parentheses.

| Vibrational mode |                                | <i>trans</i> - $\text{CD}_2(\text{OD})_2$ |           | Vibrational mode |                                 | <i>cis</i> - $\text{CD}_2(\text{OD})_2$ |           |
|------------------|--------------------------------|-------------------------------------------|-----------|------------------|---------------------------------|-----------------------------------------|-----------|
|                  |                                | B3LYP/aug-cc-pVTZ                         |           |                  |                                 | B3LYP/aug-cc-pVTZ                       |           |
|                  |                                | Wavenumber                                | Intensity |                  |                                 | Wavenumber                              | Intensity |
| $\nu_1$          | OD stret.                      | 2762 (2670)                               | 16 (19)   | $\nu_1$          | OD stret.                       | 2775 (2676)                             | 14 (14)   |
| $\nu_2$          | OD stret.                      | 2762 (2664)                               | 28 (19)   | $\nu_2$          | OD stret.                       | 2774 (2674)                             | 25 (20)   |
| $\nu_3$          | $\text{CD}_2$ stret.           | 2294 (2184)                               | 27 (11)   | $\nu_3$          | $\text{CD}_2$ stret.            | 2316 (2244)                             | 19 (14)   |
| $\nu_4$          | $\text{CD}_2$ stret.           | 2199 (2079)                               | 42 (25)   | $\nu_4$          | $\text{CD}_2$ stret.            | 2182 (2073)                             | 49 (29)   |
| $\nu_5$          | $\text{CD}_2$ sciss.           | 1161 (1140)                               | 12 (10)   | $\nu_5$          | $\text{CD}_2$ sciss.            | 1152 (1130)                             | 5 (5)     |
| $\nu_6$          | $\text{CD}_2$ wag              | 1132 (1102)                               | 177 (140) | $\nu_6$          | COD bend + $\text{CD}_2$ sciss. | 1116 (1088)                             | 21 (19)   |
| $\nu_7$          | COD bend + $\text{CD}_2$ wag   | 1097 (1072)                               | 18 (19)   | $\nu_7$          | $\text{CD}_2$ wag               | 1112 (1085)                             | 168 (125) |
| $\nu_8$          | COD bend + $\text{CD}_2$ twist | 1033 (1014)                               | 0 (0)     | $\nu_8$          | $\text{CD}_2$ twist             | 1009 (982)                              | 14 (45)   |
| $\nu_9$          | OCO sym. stret.                | 988 (965)                                 | 46 (46)   | $\nu_9$          | OCO sym. stret.                 | 989 (970)                               | 40 (39)   |
| $\nu_{10}$       | OCO asym. stret.               | 980 (958)                                 | 112 (125) | $\nu_{10}$       | OCO asym. stret.                | 981 (959)                               | 135 (114) |
| $\nu_{11}$       | $\text{CD}_2$ twist            | 858 (844)                                 | 10 (11)   | $\nu_{11}$       | COD bend + $\text{CD}_2$ twist  | 834 (819)                               | 41 (42)   |
| $\nu_{12}$       | $\text{CD}_2$ rock             | 744 (717)                                 | 24 (15)   | $\nu_{12}$       | COD bend + $\text{CD}_2$ rock   | 754 (755)                               | 9 (6)     |
| $\nu_{13}$       | OCO bend                       | 514 (500)                                 | 39 (33)   | $\nu_{13}$       | OCO bend                        | 514 (501)                               | 25 (17)   |
| $\nu_{14}$       | COD torsion                    | 277 (235)                                 | 90 (70)   | $\nu_{14}$       | COD torsion                     | 278 (236)                               | 58 (48)   |
| $\nu_{15}$       | COD torsion                    | 272 (269)                                 | 37 (53)   | $\nu_{15}$       | COD torsion                     | 131 (46)                                | 39 (23)   |

**Table S12.** Rotational parameters of *trans*-CH<sub>2</sub>(OH)<sub>2</sub> at ground state  $v'' = 0$  and first vibrationally-excited state  $v' = 1$  for different vibrational modes.

| Vibrational mode |             | <i>trans</i> -CH <sub>2</sub> (OH) <sub>2</sub> |        |        |          |          |          | Transition type |
|------------------|-------------|-------------------------------------------------|--------|--------|----------|----------|----------|-----------------|
|                  |             | Rotational constant (cm <sup>-1</sup> )         |        |        |          |          |          |                 |
|                  |             | A                                               | B      | C      | A' / A'' | B' / B'' | C' / C'' |                 |
|                  | $v''=0$     | 1.3859                                          | 0.3350 | 0.2966 |          |          |          |                 |
| OCO asym. stret. | $v'_{10}=1$ | 1.3761                                          | 0.3337 | 0.2945 | 0.9929   | 0.9961   | 0.9929   | <i>a</i> -type  |
| OCO sym. stret.  | $v'_{11}=1$ | 1.3921                                          | 0.3335 | 0.2959 | 1.0045   | 0.9955   | 0.9976   | <i>b</i> -type  |

**Table S13.** Rotational parameters of *trans*-CD<sub>2</sub>(OH)<sub>2</sub> at ground state  $v'' = 0$  and first vibrationally-excited state  $v' = 1$  for different vibrational modes.

| Vibrational mode        | <i>trans</i> -CD <sub>2</sub> (OH) <sub>2</sub> |                                         |        |        |          |          |          | Transition type                                |
|-------------------------|-------------------------------------------------|-----------------------------------------|--------|--------|----------|----------|----------|------------------------------------------------|
|                         | "                                               | Rotational constant (cm <sup>-1</sup> ) |        |        |          |          |          |                                                |
|                         |                                                 | A                                       | B      | C      | A' / A'' | B' / B'' | C' / C'' |                                                |
|                         | $v''=0$                                         | 1.0244                                  | 0.3245 | 0.2832 |          |          |          |                                                |
| COH bending             | $v'_5=1$                                        | 1.0265                                  | 0.3246 | 0.2832 | 1.0020   | 1.0003   | 1.0000   | <i>a</i> -type : <i>c</i> -type<br>= 0.9 : 0.1 |
| CD <sub>2</sub> wagging | $v'_8=1$                                        | 1.0227                                  | 0.3231 | 0.2818 | 0.9983   | 0.9957   | 0.9951   | <i>a</i> -type                                 |
| OCO sym. stret.         | $v'_9=1$                                        | 1.0256                                  | 0.3235 | 0.2823 | 1.0012   | 0.9969   | 0.9968   | <i>b</i> -type                                 |
| OCO asym. stret.        | $v'_{10}=1$                                     | 1.0194                                  | 0.3241 | 0.2826 | 0.9951   | 0.9988   | 0.9979   | <i>a</i> -type                                 |

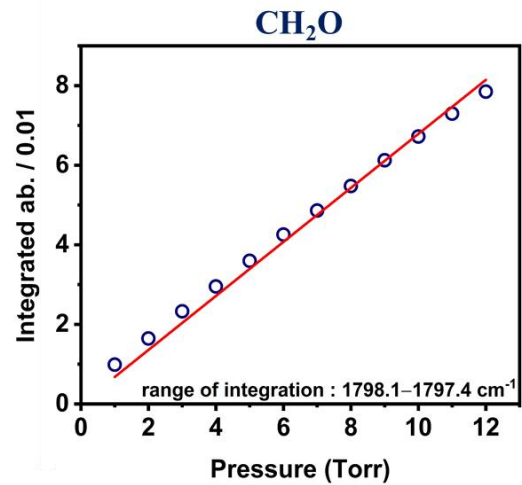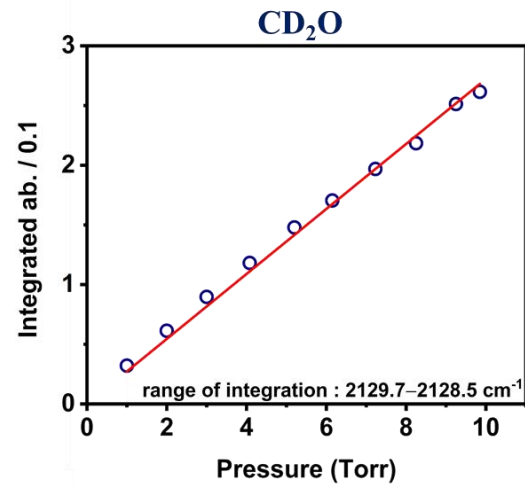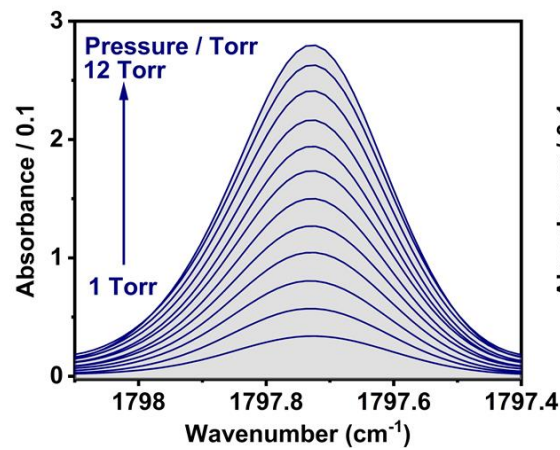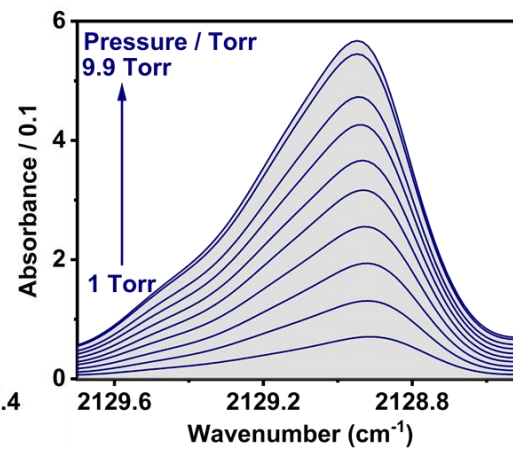



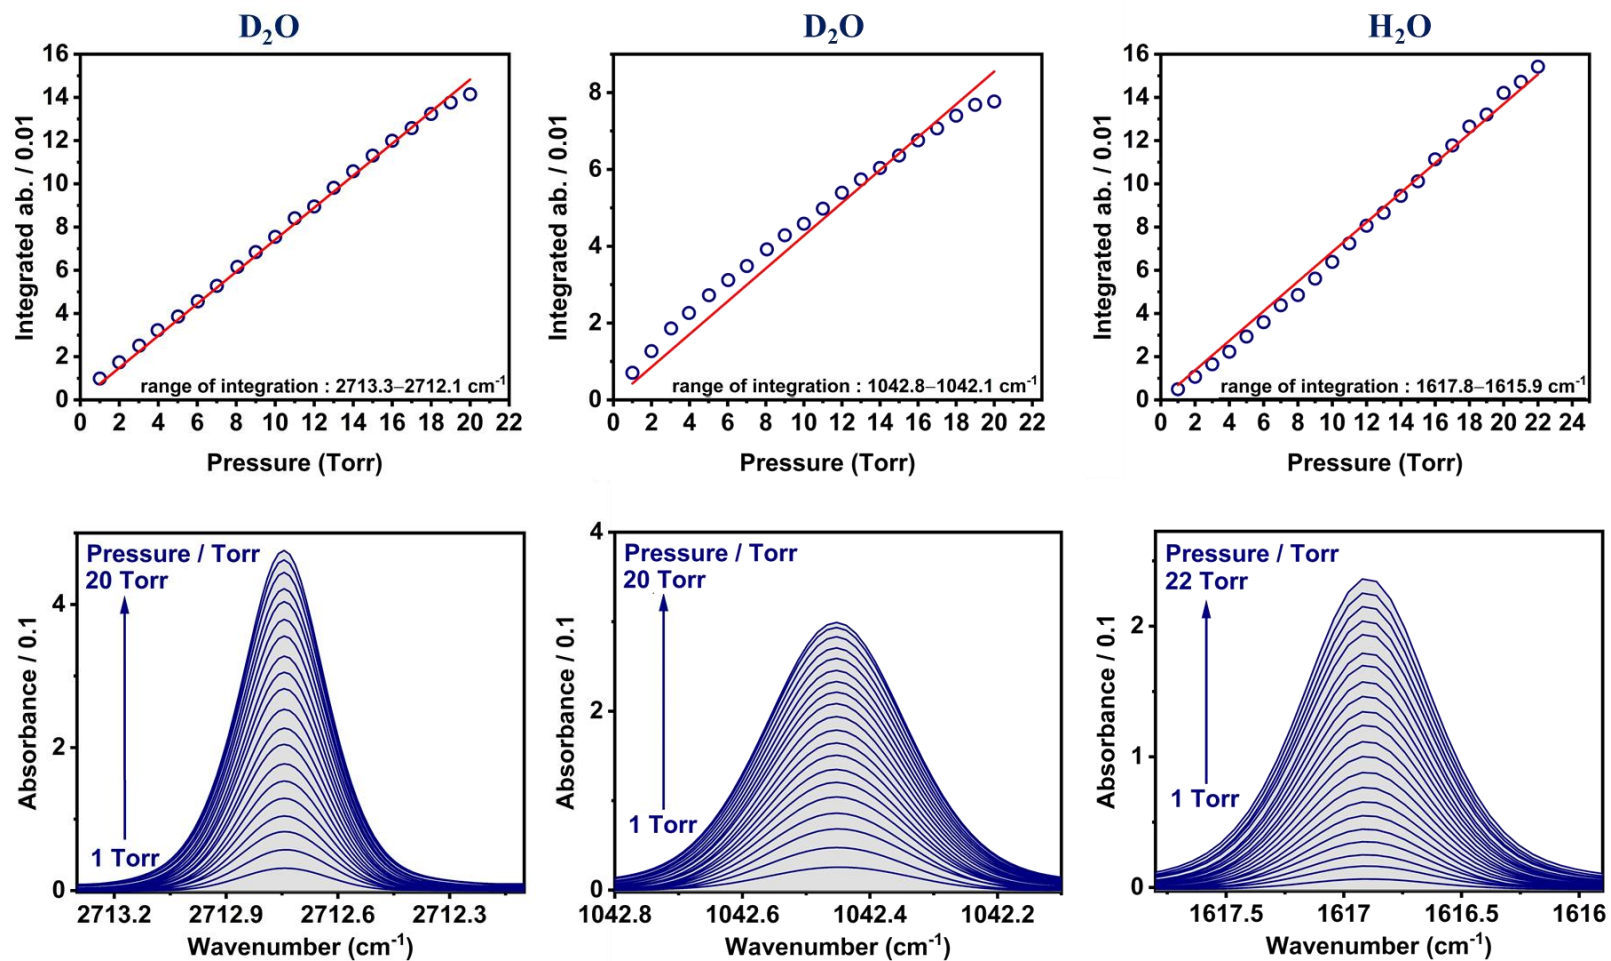

**Figure S1.** The pressures of the pure substances versus the integrated absorbances at given wavenumbers for deriving the partial pressures in the mixed samples.

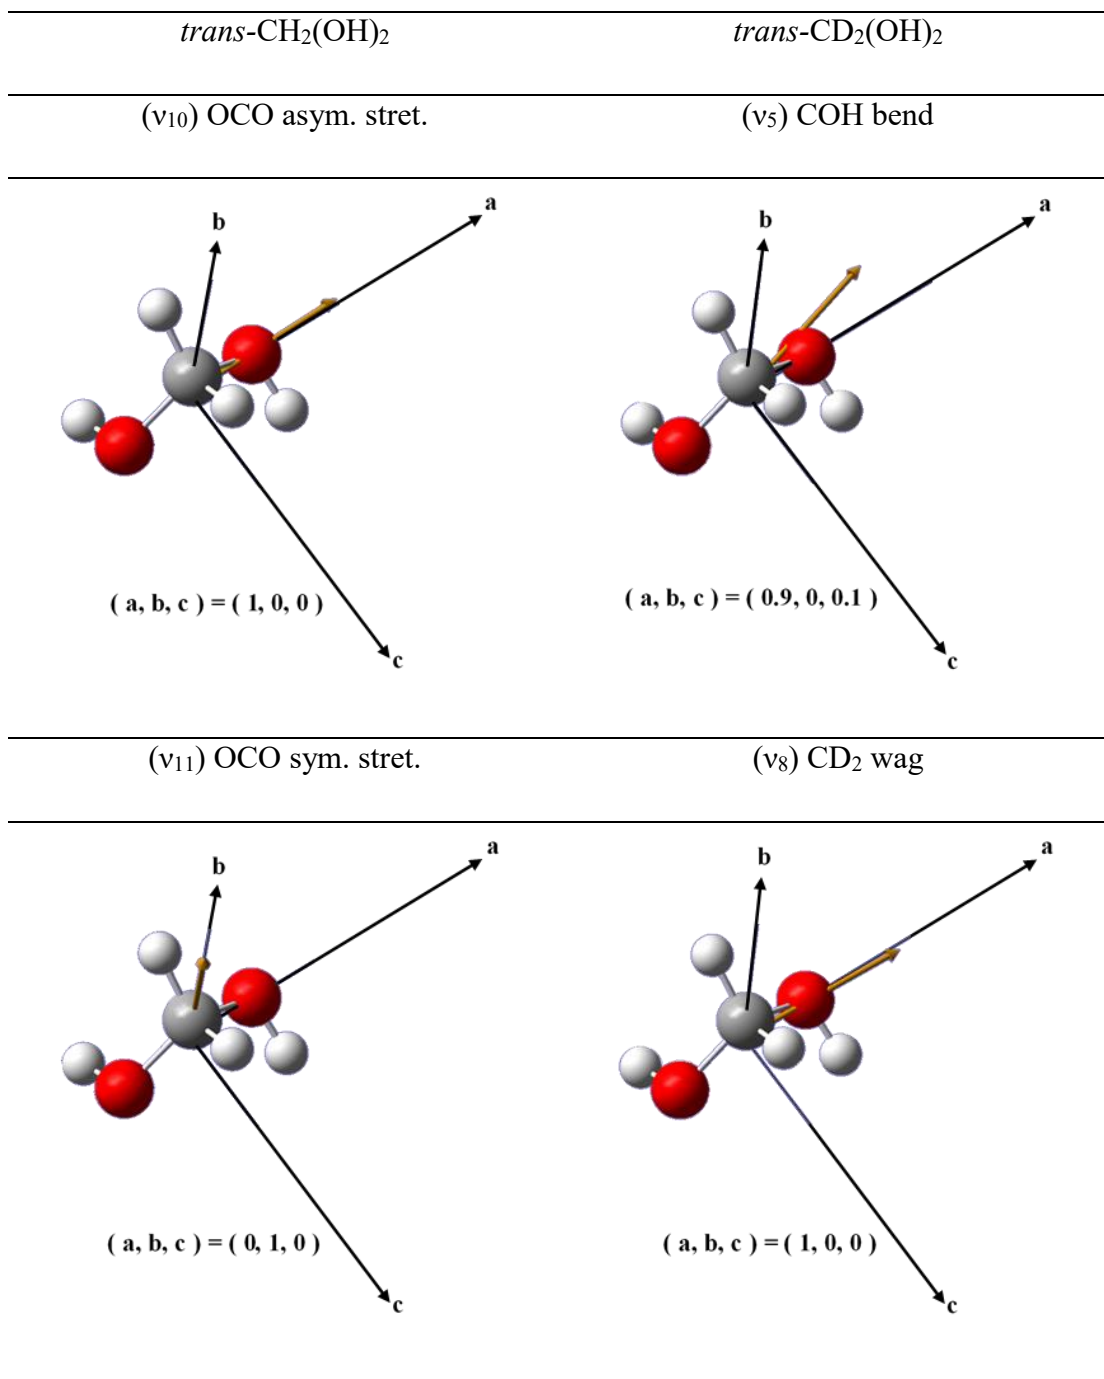

**Figure S2.** Dipole derivatives of relevant vibrations of *trans*-CH<sub>2</sub>(OH)<sub>2</sub> and *trans*-CD<sub>2</sub>(OH)<sub>2</sub>.

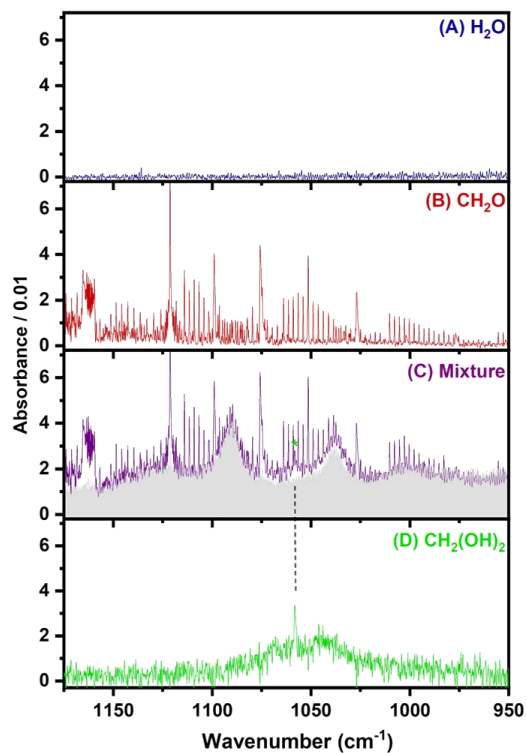

**Figure S3.** Gaseous IR absorption spectra of (A) H<sub>2</sub>O, (B) CH<sub>2</sub>O, and (C) mixture of (A) and (B) in the bath of N<sub>2</sub>. The gray shadow denotes the IR spectrum of the deposit component on the BaF<sub>2</sub> window. (D) Difference spectrum by subtracting (C) with (A), (B), and the deposited component and multiplied by 2.5 to fit the scales in (A) and (B).

## REFERENCES

---

<sup>1</sup> C. Barrientos, P. Redondo, H. Martínez and A. Largo, *Astrophys. J.*, 2014, **784**, 132.

<sup>2</sup> B. M. Hays and S. L. W. Weaver, *J. Phys. Chem. A*, 2013, **117**, 7142–7148.
